# Supplementary material for: Sirt6 deficiency results in progression of glomerular injury in the kidney
Source: publisher site journal article supplement (doi:10.18632/aging.101214), 2017-03-28
Supplement: Supplementary file 1 [file aging-v9i3-101214-supplementary-material-SD1.pdf]

## SUPPLEMENTARY MATERIAL

### Generating *Sirt6* global knockout mice

*Sirt6*-floxed (*Sirt6*<sup>flx/flx</sup>) mice on a C57BL/6/129svJ mixed background were generously provided by Dr. Chuxia Deng, in which exons 2 and 3 of the *Sirt6* gene were flanked by *LoxP* recombination sites [1]. C57BL/6J mice expressing Cre recombinase under the control of *Tie2* promoter/enhancer (Stock No: 004128) were purchased from the Jackson Laboratory (Bar Harbor, ME). To generate *Sirt6* global knockout (*Sirt6*<sup>-/-</sup>) mice, *Sirt6*<sup>flx/flx</sup> mice were cross-bred with *Tie2*-Cre mice to generate *Sirt6*<sup>flx/flx</sup>•*Tie2*-Cre mice. Female *Sirt6*<sup>flx/flx</sup>•*Tie2*-Cre mice were further bred with

male *Sirt6*<sup>flx/flx</sup> mice. The offspring were genotyped by tail genomic DNA. Because *Tie2* promoter/enhancer drives expression of Cre-recombinase in the female germ line [2], it results in the global deletion of the maternally inherited floxed allele and some offspring were *Sirt6*<sup>+/-</sup>. *Sirt6*<sup>+/-</sup> males were then crossed with *Sirt6*<sup>+/-</sup> females to obtain *Sirt6*<sup>-/-</sup> mice. *Sirt6* floxed and null alleles were confirmed by PCR genotyping (Supplementary Figure 1A and 1B) using the following primers: F1-5'-GCT AAT GGG AAC GAG ACC AA-3', R1-5'-ACC CAC CTC TCT CCC CTA AA -3'; R3-5'-GCG TCC ACT TCT CTT TCC TG-3'. PCR products were 444 bp (F1 and R1 for *Sirt6* floxed allele) and 524 bp (F1 and R3 for *Sirt6* null allele), respectively.

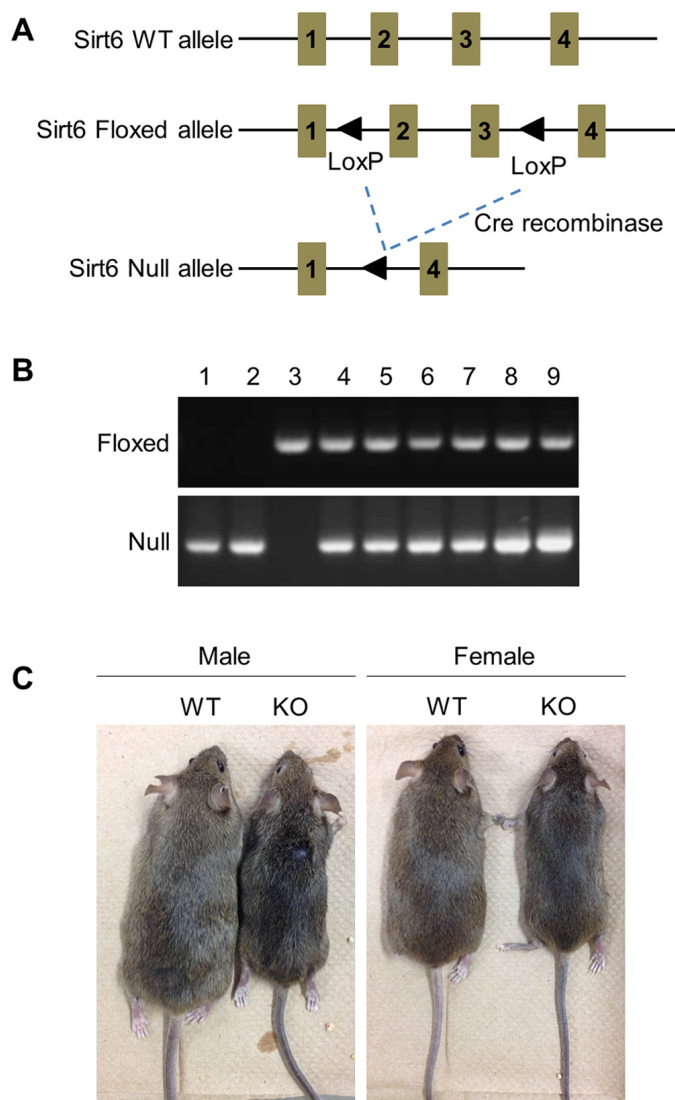

**Supplementary Figure 1. Generation of *Sirt6* KO mice.** (A) Schematic representation of deletion of floxed *Sirt6* exons (exons 2 and 3) by Cre expression. Black arrows: *LoxP* sites; gray bars: *Sirt6* exons (B) Representative PCR genotyping result of a litter of pups from breeding of a *Sirt6*<sup>+/-</sup> male with *Sirt6*<sup>+/-</sup> female. #1, 2: *Sirt6*<sup>-/-</sup>; #3: *Sirt6*<sup>+/-</sup>; #4, 5, 6, 6, 8, 9: *Sirt6*<sup>+/-</sup>. (C) Representative images of *Sirt6* Control and KO mice at 7 months of age.

## SUPPLEMENTARY REFERENCES

1. Xiao C, Kim HS, Lahusen T, Wang RH, Xu X, Gavrilova O, Jou W, Gius D, Deng CX: SIRT6 deficiency results in severe hypoglycemia by enhancing both basal and insulin-stimulated glucose uptake in mice. *J Biol Chem.* 2010; 285: 36776-36784.
2. de Lange WJ, Halabi CM, Beyer AM, Sigmund CD: Germ line activation of the Tie2 and SMMHC promoters causes noncell-specific deletion of floxed alleles. *Physiol Genomics.* 2008; 35: 1-4.
